# Supplementary material for: Hypermethylation of serotonin transporter gene in bipolar disorder detected by epigenome analysis of discordant monozygotic twins
Source: PubMed Central journal article supplement — Transl Psychiatry. 2011 Jul 26;1(7):e24–. doi: 10.1038/tp.2011.26 (PMC3309511; doi:10.1038/tp.2011.26), 2011-07-26

Fig S2 Chromosomal distribution of copy number differences

a) CNV array in pair 1

Total = 2348 probes (including 858 Ig-related regions; FC>1.2)

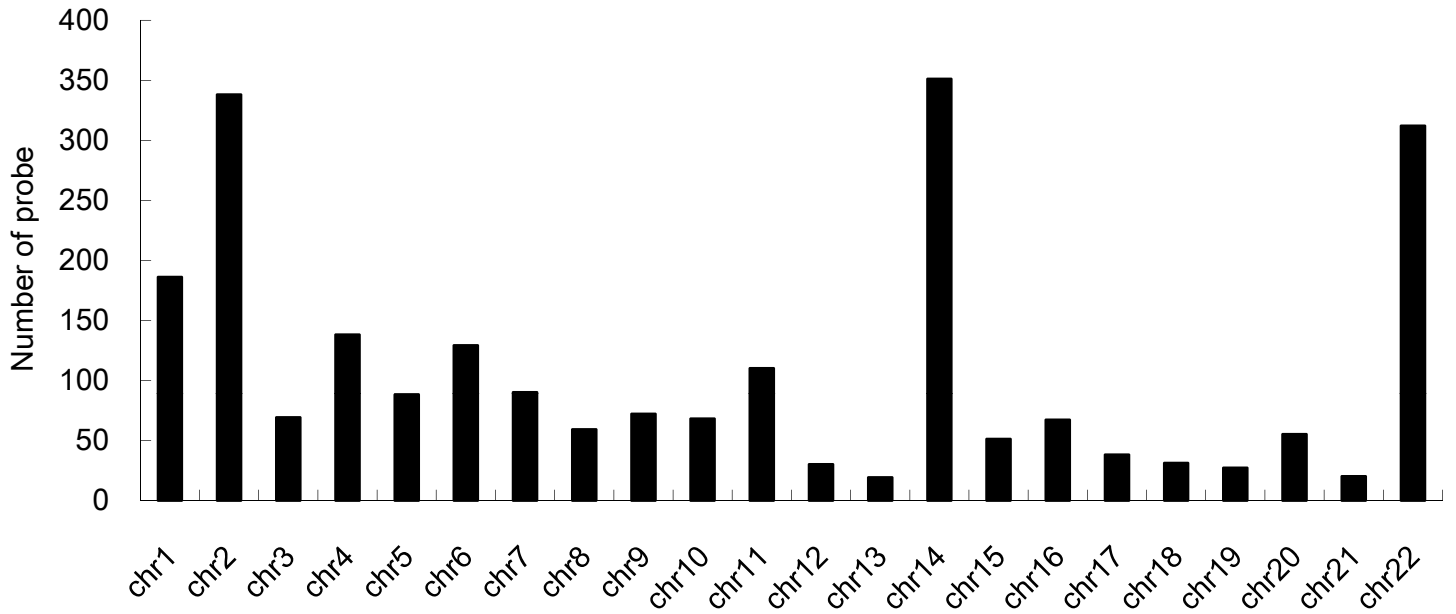

b) CNV array in pair 2

Total=3249 probes (including 910 Ig-related regions; FC>1.2)

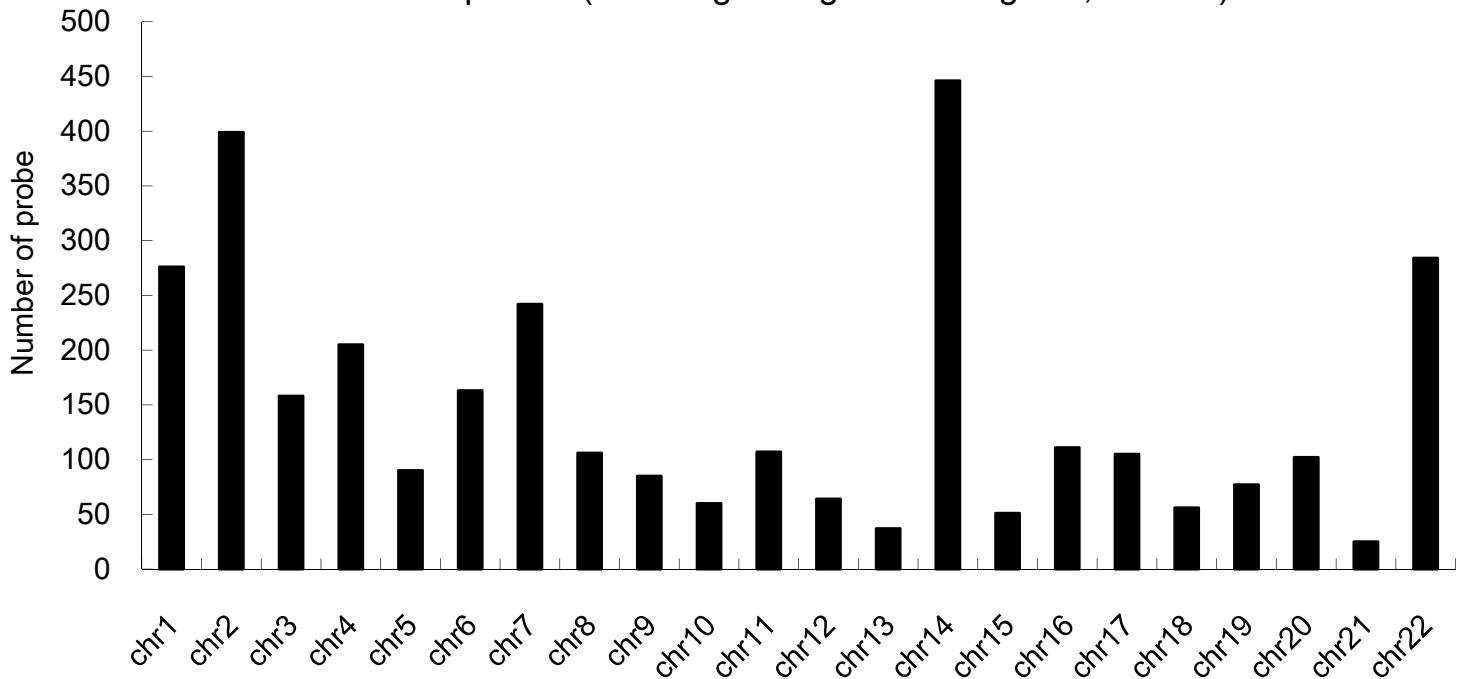

Supplement: tp201126x2.pdf [file tp201126x2.pdf]
