# Supplementary material for: Hypermethylation of serotonin transporter gene in bipolar disorder detected by epigenome analysis of discordant monozygotic twins
Source: PubMed Central journal article supplement — Transl Psychiatry. 2011 Jul 26;1(7):e24–. doi: 10.1038/tp.2011.26 (PMC3309511; doi:10.1038/tp.2011.26), 2011-07-26
Supplement: tp201126x6.pdf [file tp201126x6.pdf]

# Fig. S6 Representative results of bisulfite sequencing

a) C-specific MR in pair 1 ( $-10 \cdot \log_{10}(P \text{ value})=118.73$ )

Healthy co-twin

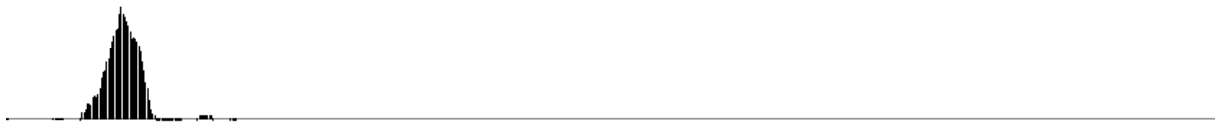

Bipolar twin

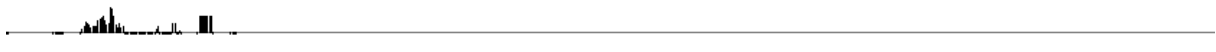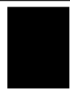

Differentially methylated region

ZNF793

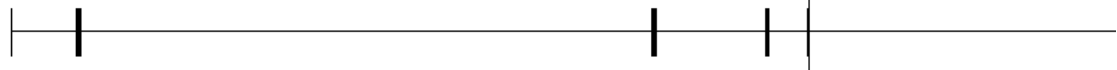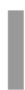

CpG island

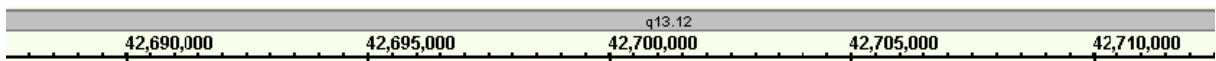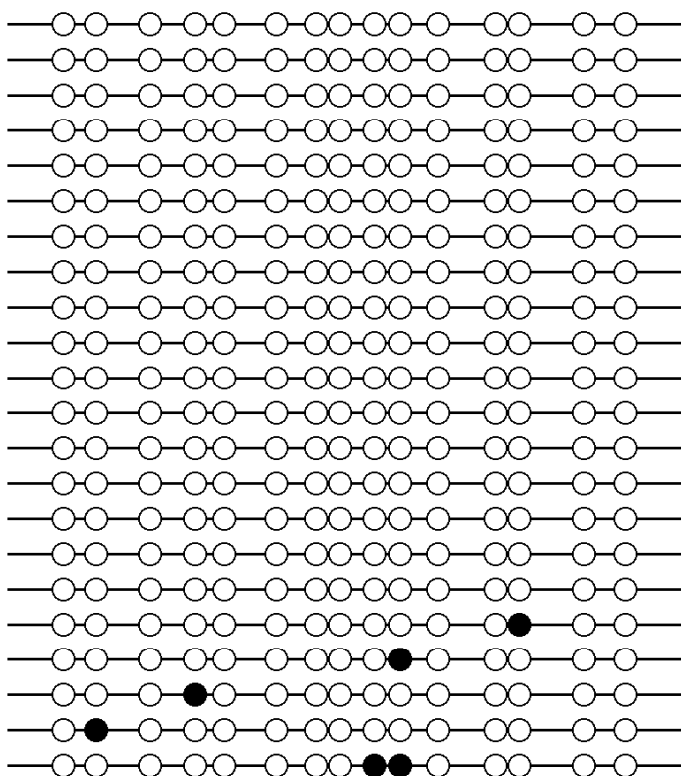

Bipolar twin

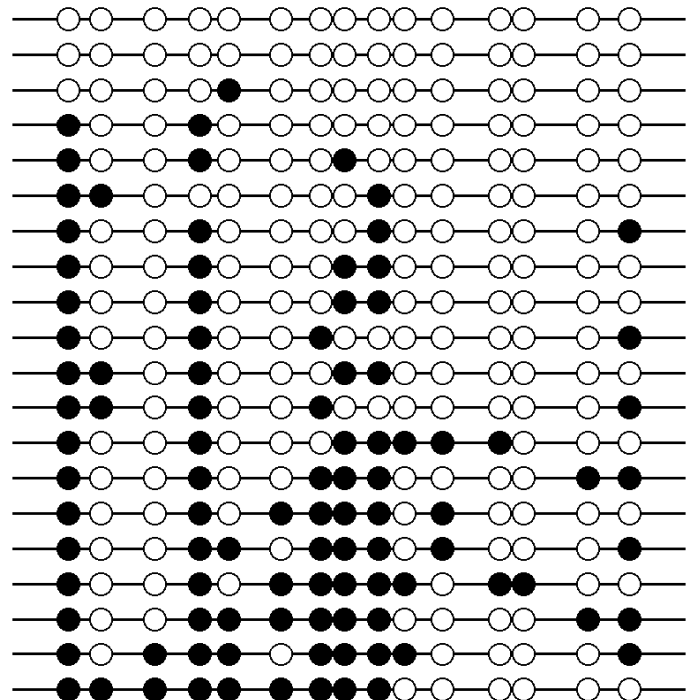

Healthy co-twin

b) C-specific MR in pair 2 ( $-10 \cdot \log_{10}(P \text{ value}) = 41.78$ )

Healthy co-twin

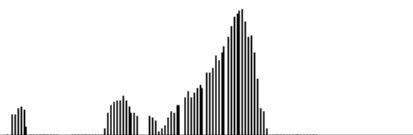

Bipolar twin

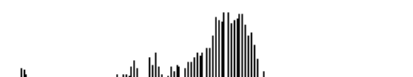

Differentially methylated region

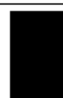

INSL6

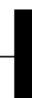

CpG island

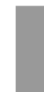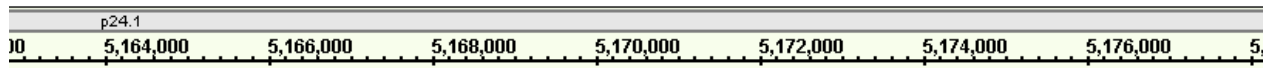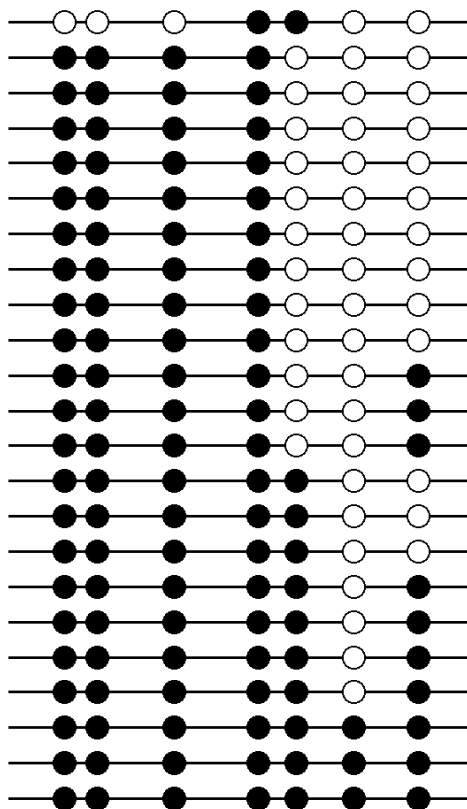

Bipolar twin

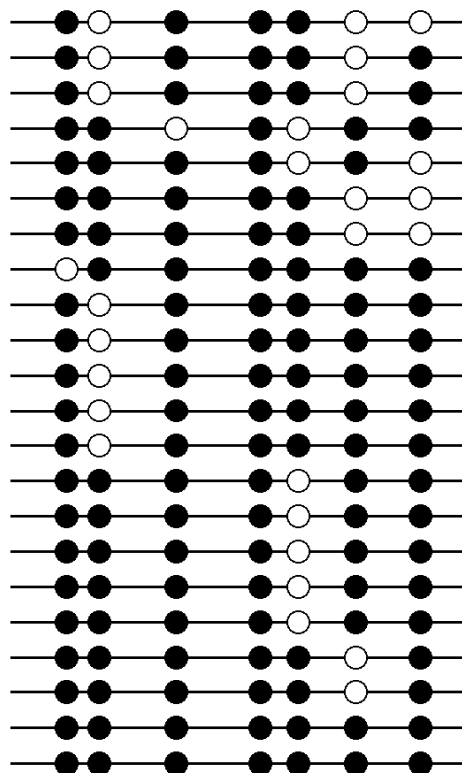

Healthy co-twin

c) C-specific MR in pair 2 ( $-10 \cdot \log_{10}(\text{P value}) = 44.56$ )

Healthy co-twin

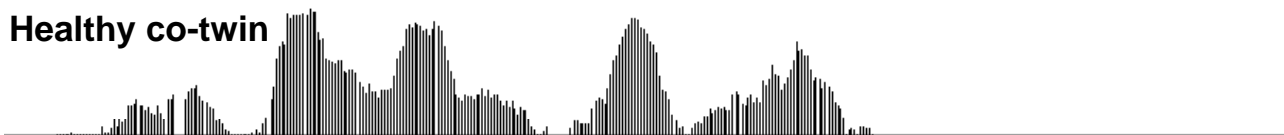

Bipolar twin

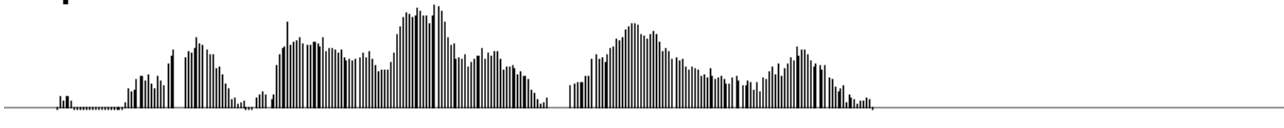

Differentially methylated region

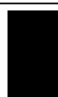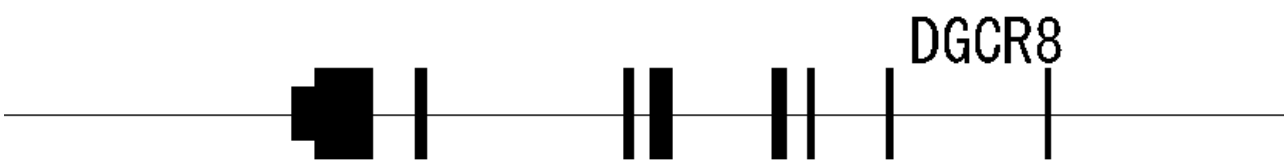

CpG island

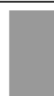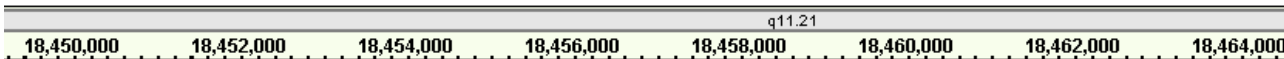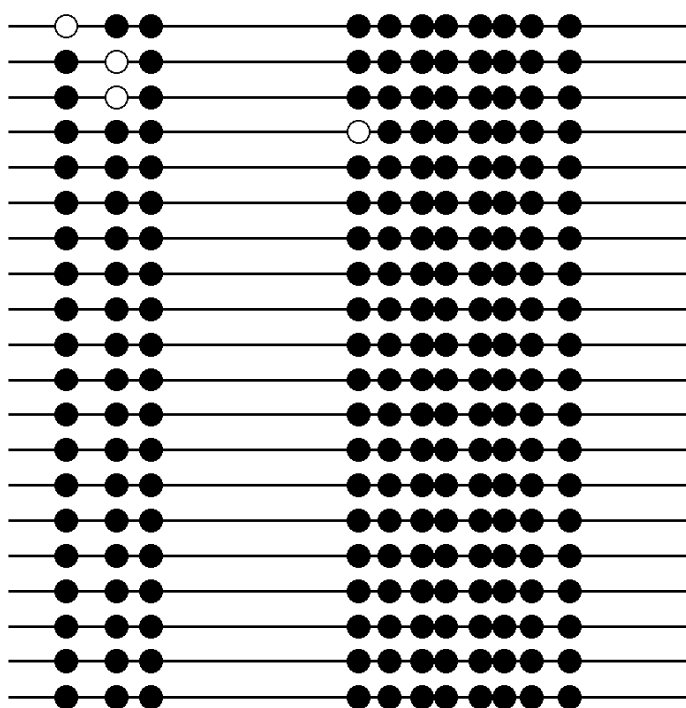

Bipolar twin

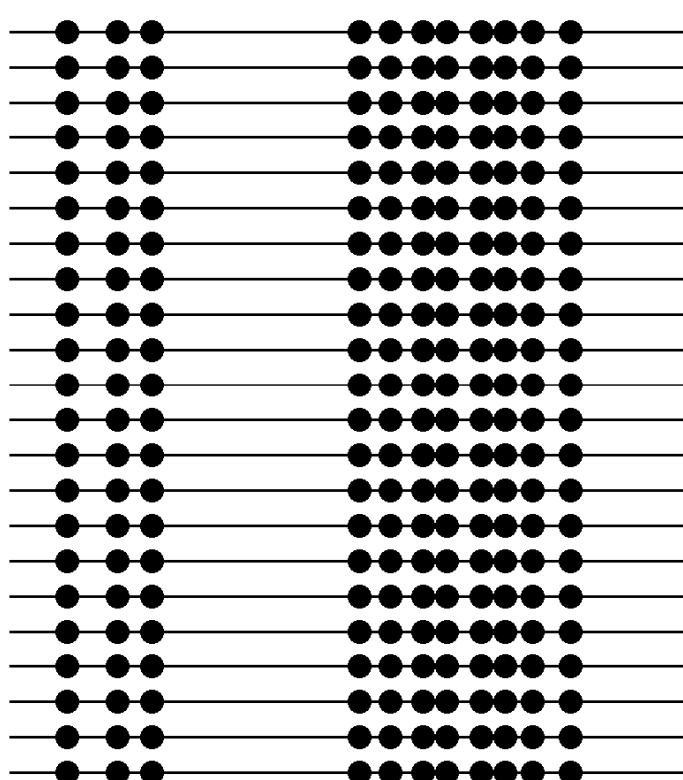

Healthy co-twin
