# Supplementary material for: Hypermethylation of serotonin transporter gene in bipolar disorder detected by epigenome analysis of discordant monozygotic twins
Source: PubMed Central journal article supplement — Transl Psychiatry. 2011 Jul 26;1(7):e24–. doi: 10.1038/tp.2011.26 (PMC3309511; doi:10.1038/tp.2011.26), 2011-07-26
Supplement: tp201126x8.pdf [file tp201126x8.pdf]

# Supplementary Figure 8

a)

Healthy co-twin

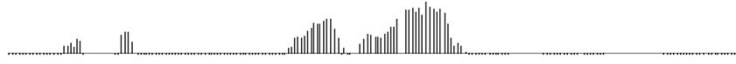

Bipolar twin

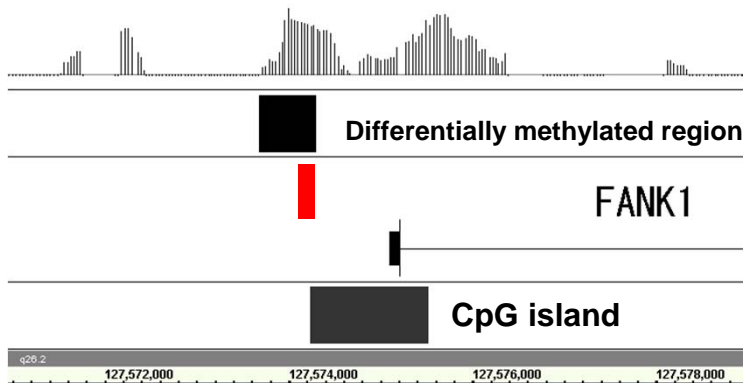

b)

TGAGAGGGGGAAAACCTAATTTGGAAGAATATAATAAATGTCAGTTTCCATCACAGAA  
 TATATGCTTCTCAAGTTCAATTAACCTCTCAATGATTCCCTAAGAGGAAAGTAATTCTC  
 CTTAGTGTCTTGTGCATCCATGGAGTGGAAATCTTTCTACTGGCAAGATTAGTAATCA  
 CTTCCATGACCCCCAAAACG GCTCTTCTTCCATTTCCCTCAAGTACTGTCTGGAGCA  
 GCGGTTGGAATTAATAGAGGGGCCATAATCTCCAGACCTGAATACCAAATCAATCCT  
 GCAGCCCCCACACCCTTAATGCCCTGCACTTTCTTGCTTATCCTTTTTCTCTCGTC  
 TCCATTTTTCTTCTCCTTCTGGTGTTCCGGAACCTATGATACTCTCCTGGTTGTTTG  
 AATTTTTACAACCTACCAGATAATAATCTCTTGTGATCCTCAAAGCTTCTTAAAGCAA  
 ACCCTGAATCACTGTGTTTTAAAACCAGTATGAAAGACTATTGTGTGGGATAATGTTA  
 CATTGTTTACAGCCCTACAAAGTTTGGCCACAAAA CG<sub>1</sub>TGTGGGCAGATTCCG<sub>2</sub>TAA  
 CCAACCG<sub>3</sub>GAAA CG<sub>4</sub>CG<sub>5</sub>AAGGACTGAAACAAATCAACACACAAAA

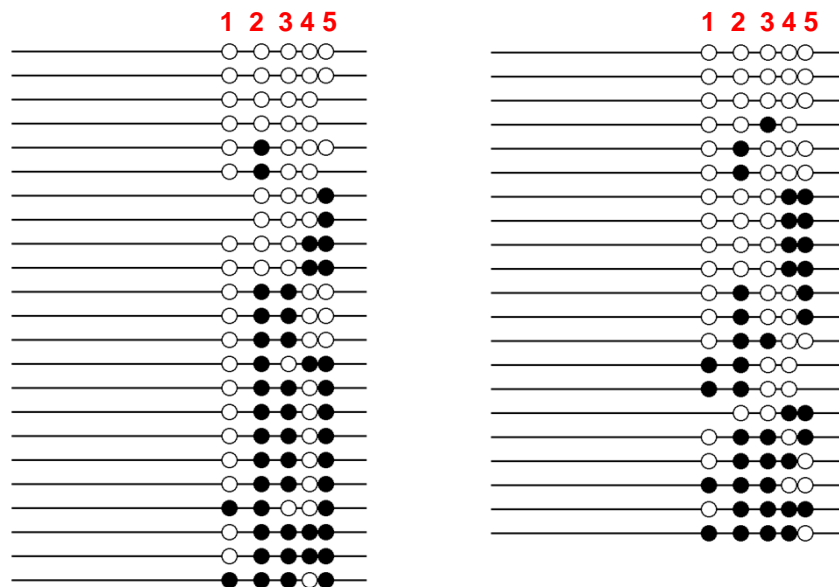

Bipolar twin

Healthy co-twin
