# Supplementary material for: Hypermethylation of serotonin transporter gene in bipolar disorder detected by epigenome analysis of discordant monozygotic twins
Source: PubMed Central journal article supplement — Transl Psychiatry. 2011 Jul 26;1(7):e24–. doi: 10.1038/tp.2011.26 (PMC3309511; doi:10.1038/tp.2011.26), 2011-07-26
Supplement: tp201126x9.pdf [file tp201126x9.pdf]

# Supplementary Figure 9

a) **Healthy co-twin**

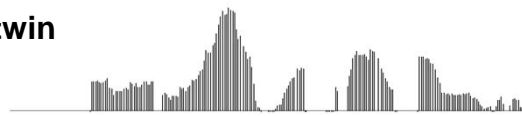

**Bipolar twin**

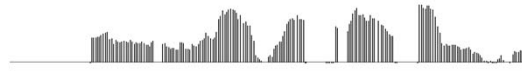

**Differentially methylated region**

KIAA1530

**CpG island**

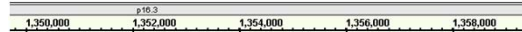

b)

TAATCCTACCATTTCTGTCAGGACATAATCTCTTTCTCCAATTTACATTTTAATTACAAGGCCAGCTGAACTAGGT  
 AAAATCAATAATGTCAGCGCTGGGCAGGCCCGCCTGGGCGCAGAGGCCCCCTCTCCGTTTCCTACCATCGATT  
 CCCTCCCTCACTGCTGCTTTGGTGCTTCAGGCAAATAGGTGCCACTTGGCCAATGTAAACAGAAAAGGGGAT  
 TTGGACATTTTTATGATTCTTTCTCAAACAACCTGTGGGAGTGAATTTGAGCCAAGATACTGGACTCG<sub>1</sub>AGTGAG  
 ACG<sub>2</sub>CG<sub>3</sub>TGCG<sub>4</sub>GGCAAGGCG<sub>5</sub>GGCG<sub>6</sub>CG<sub>7</sub>CG<sub>8</sub>TTCG<sub>9</sub>GCTGTGACG<sub>10</sub>TGTGGCCTCTTGTTCG<sub>11</sub>GGAG  
 TCG<sub>12</sub>TTATTCTTCTGAAAAATGCCCTCAGTGCCTGAGGAATGCTGTCTGATTTTGGGGTTTTGCTTTGAAAGTA  
 TGTGAGAGAGATTGATTTTCCA<sub>13</sub>CG<sub>14</sub>ATGCG<sub>15</sub>CAAGTGGGAGTGTGTTTAGTCCCTAAGTATTTACCCTG  
 CTTTAACA<sub>16</sub>CGCTTACCCATCTTTTTAATGGTTTAAAAACAACAAATCG<sub>16</sub>ATGAAAAATATATTTTATTCTTGTAACT  
 CTTAGGAATTTCTCAGATTGATCTTTGGCTGCG<sub>17</sub>ATTGTATCTAAATGTCACATTGTTCACTTGTGAGTCTTGCC  
 TCG<sub>18</sub>TCACTGTGAGCATGTGCG<sub>19</sub>TGTGTGCG<sub>20</sub>TGTGTGTGCATGCG<sub>21</sub>TGTGCTGACAGCCCG<sub>22</sub>TATCTGTG  
 TCATGTGATTGCGCGAATACTGAGGGGCACTTGGCAGGTTTGTGAGCAACACCCCGGGACACCGGCATTGAGT  
 GCCAGCGCTGAGCAGGGGCTGCCCGGTGTCTCCCGGTTGCGCGCCTCGGGG

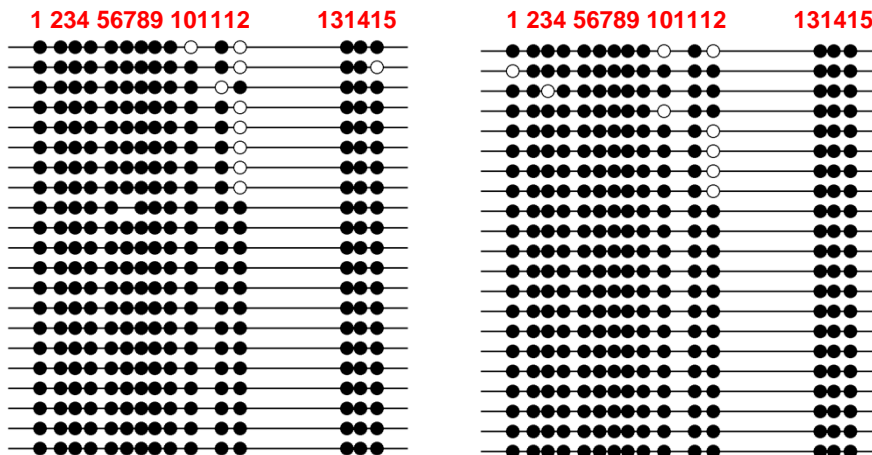

16 171819202122

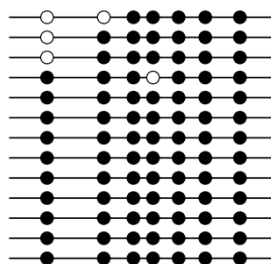

**Bipolar twin**

16 171819202122

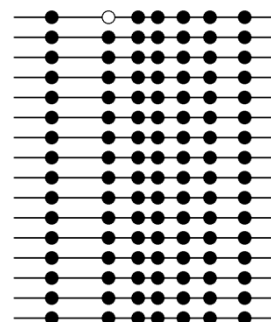

**Healthy co-twin**
