# Supplementary material for: Hypermethylation of serotonin transporter gene in bipolar disorder detected by epigenome analysis of discordant monozygotic twins
Source: PubMed Central journal article supplement — Transl Psychiatry. 2011 Jul 26;1(7):e24–. doi: 10.1038/tp.2011.26 (PMC3309511; doi:10.1038/tp.2011.26), 2011-07-26
Supplement: tp201126x10.pdf [file tp201126x10.pdf]

Supplementary Table 1 The number of each sample set

| Sample set                   | Bipolar Disorder | Control |
|------------------------------|------------------|---------|
| Discordant monozygotic twins | 2                | 2       |
| Lymphoblastoid cell lines    | 20               | 20      |
| Postmortem brains            | 31               | 32      |
