# Supplementary material for: Hypermethylation of serotonin transporter gene in bipolar disorder detected by epigenome analysis of discordant monozygotic twins
Source: PubMed Central journal article supplement — Transl Psychiatry. 2011 Jul 26;1(7):e24–. doi: 10.1038/tp.2011.26 (PMC3309511; doi:10.1038/tp.2011.26), 2011-07-26
Supplement: tp201126x11.pdf [file tp201126x11.pdf]

Supplementary Table 2 Real-time PCR primer sets

|                                    | Forward                      | Reverse                       |
|------------------------------------|------------------------------|-------------------------------|
| <i>APOB</i>                        | 5'- CCACACTGAACCAAGGCTTGT-3' | 5'- CAGAGGACACACCATGAGCAA-3'  |
| Ig-related region on chromosome 22 | 5'-CTCAGGACGTCACCACCATG-3'   | 5'- CCTGGAGGCATCACCTGTG-3'    |
| <i>XIST</i>                        | 5'- TGTGGCTCTTCTTTCACGCTT-3' | 5'- ACAGCATGTGACCCAAAAAAGG-3' |

*APOB*: Apolipoprotein B

*XIST*: X inactive-specific transcript
