# Supplementary figures and images for: Hypermethylation of serotonin transporter gene in bipolar disorder detected by epigenome analysis of discordant monozygotic twins
Source: PubMed Central journal article supplement — Transl Psychiatry. 2011 Jul 26;1(7):e24–. doi: 10.1038/tp.2011.26 (PMC3309511; doi:10.1038/tp.2011.26), 2011-07-26

Fig S1 Genome View of CNV array

a) Genome View in pair 1

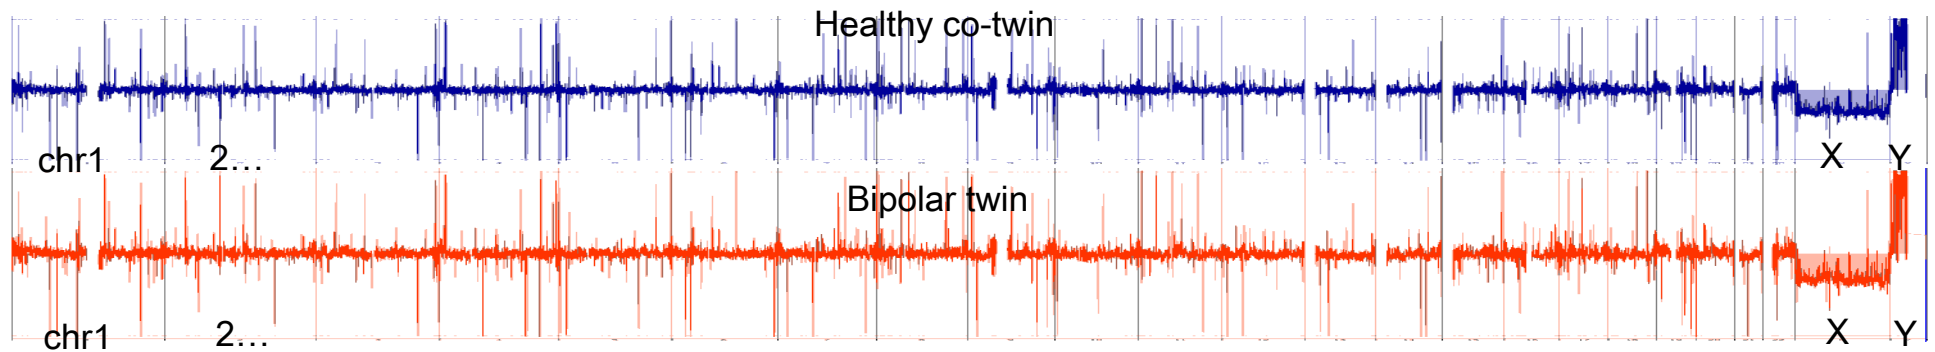

b) Genome View in pair 2

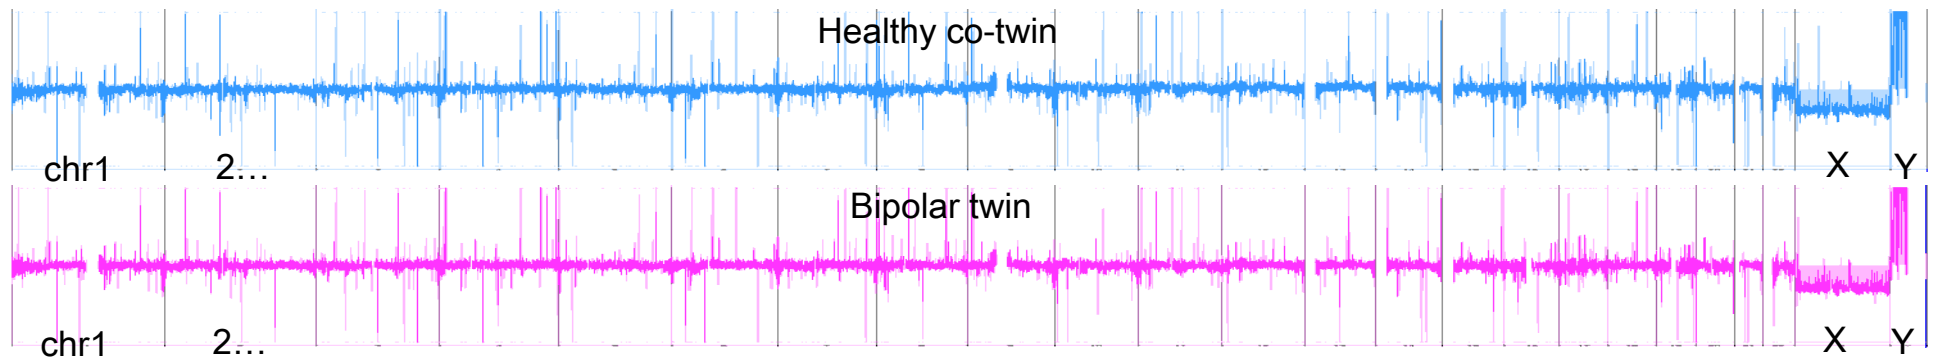

Supplement: tp201126x1.pdf [file tp201126x1.pdf]

# Fig S3 Results of RT-PCR

a)

## Ig-related region in chr22

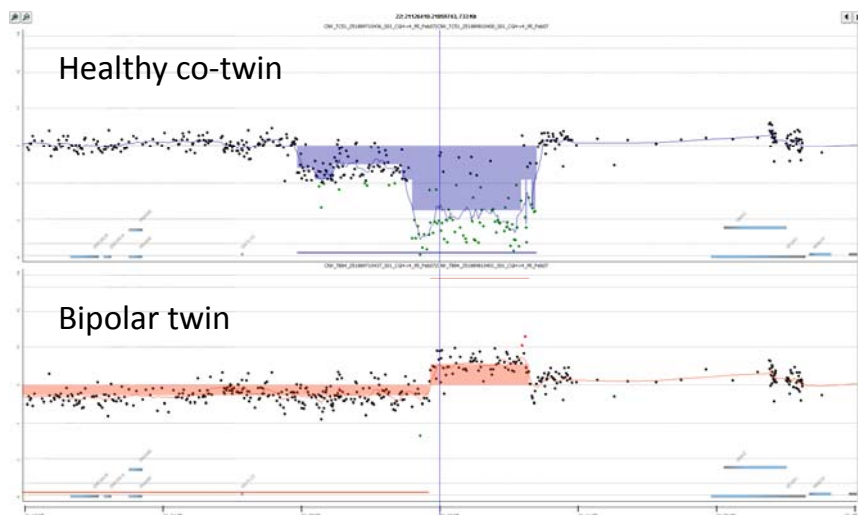

b)

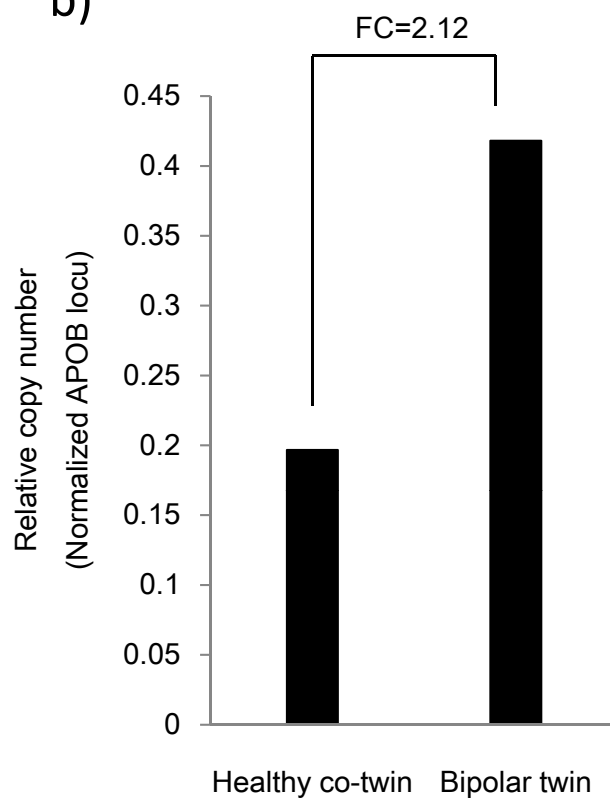

c)

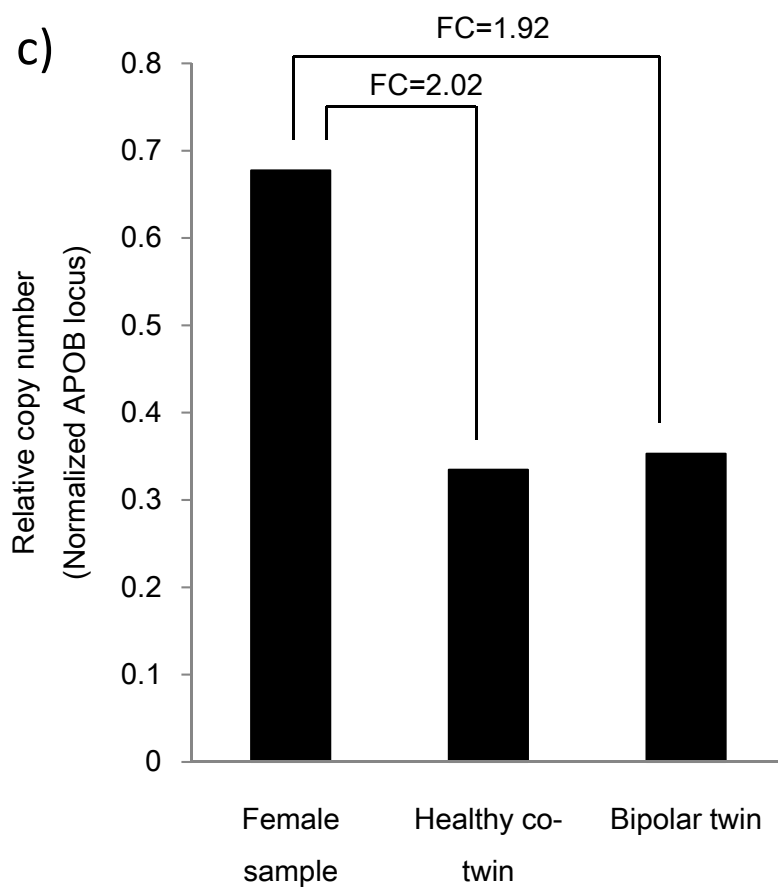

Supplement: tp201126x3.pdf [file tp201126x3.pdf]

Fig. S4 The flowchart of tiling array data analysis and filtering

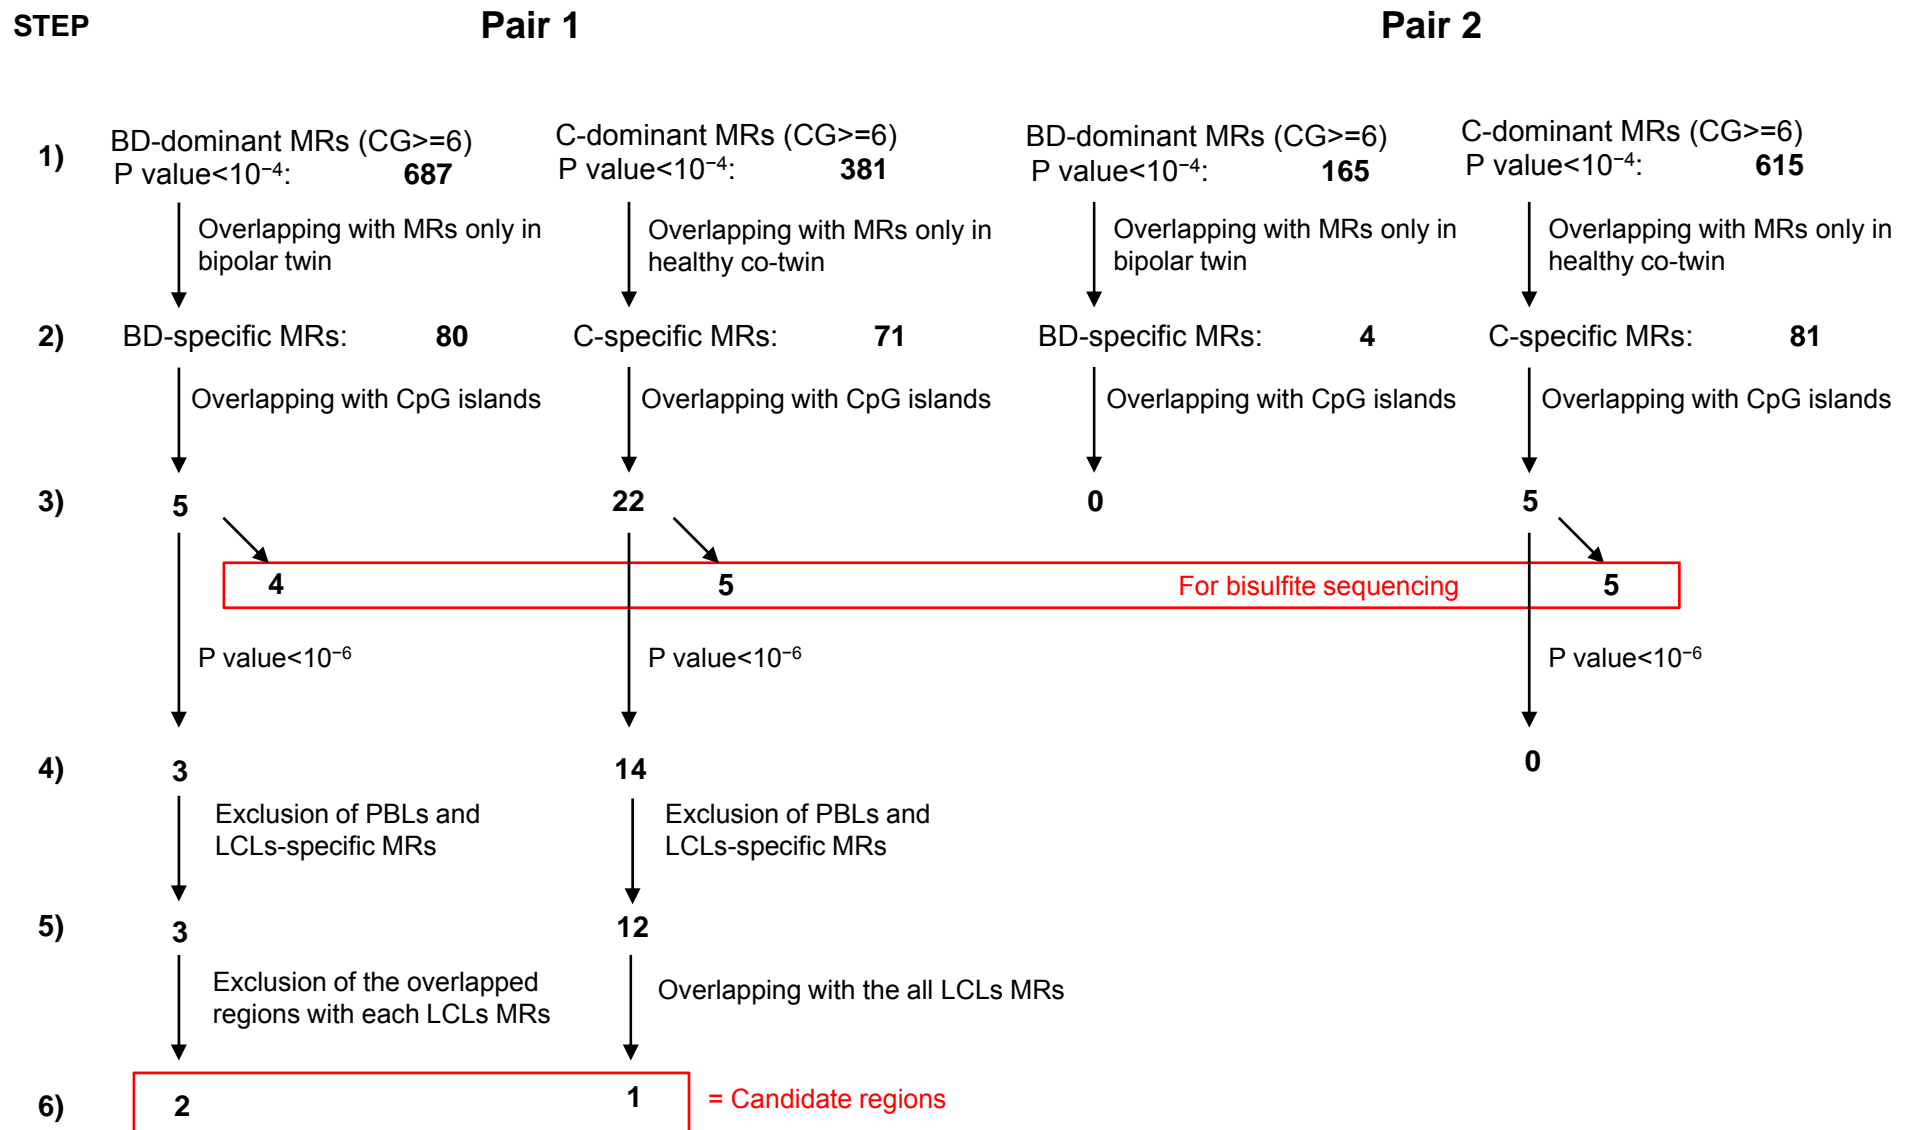

Supplement: tp201126x4.pdf [file tp201126x4.pdf]

Figure S5

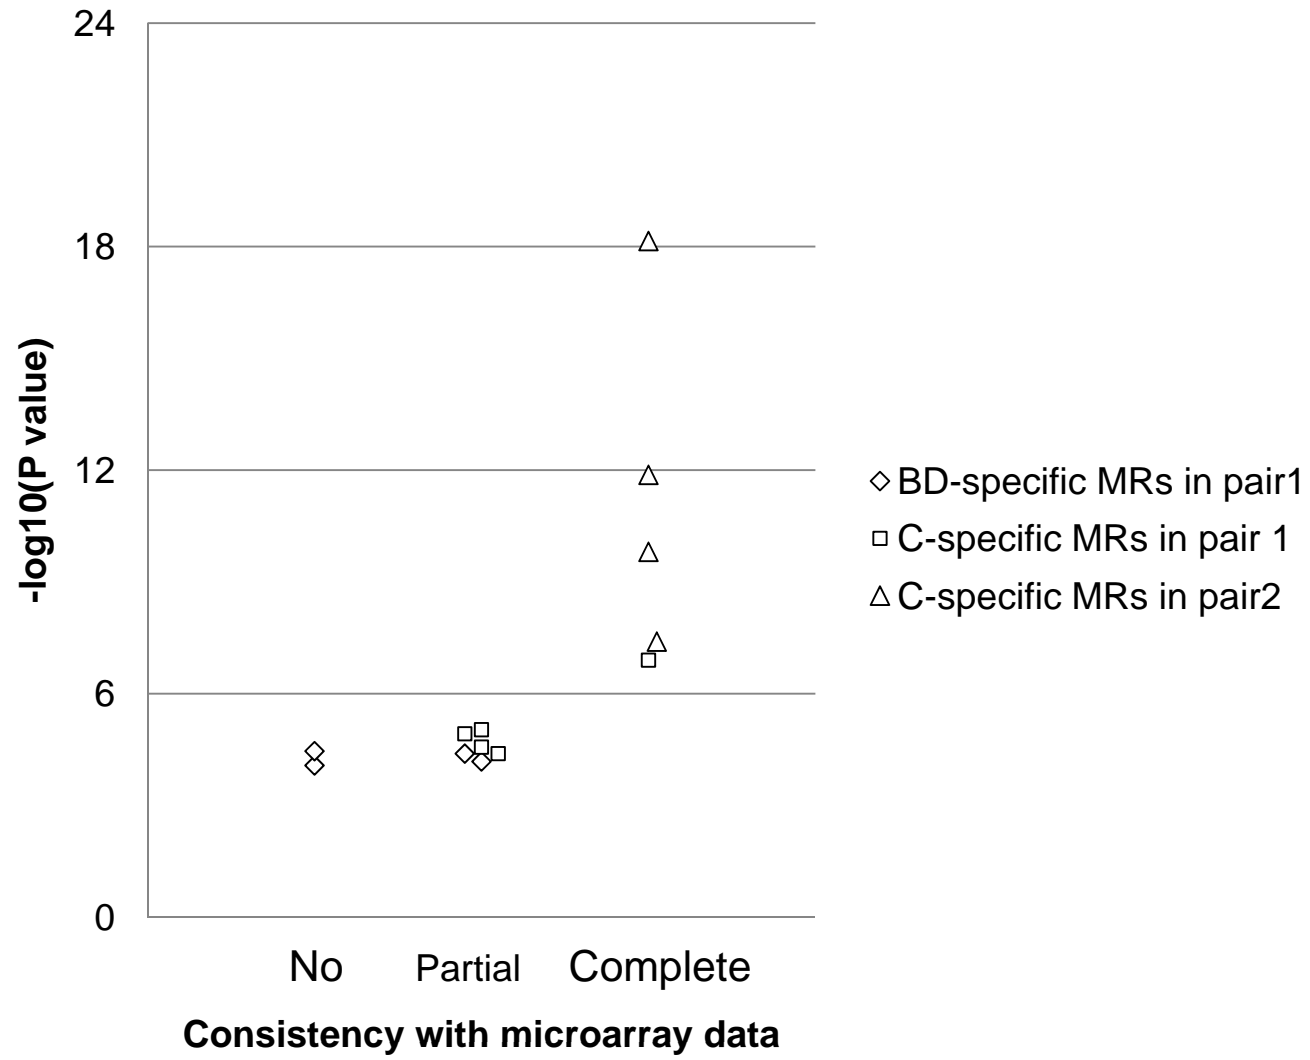

Supplement: tp201126x5.pdf [file tp201126x5.pdf]

# Supplementary Figure 7

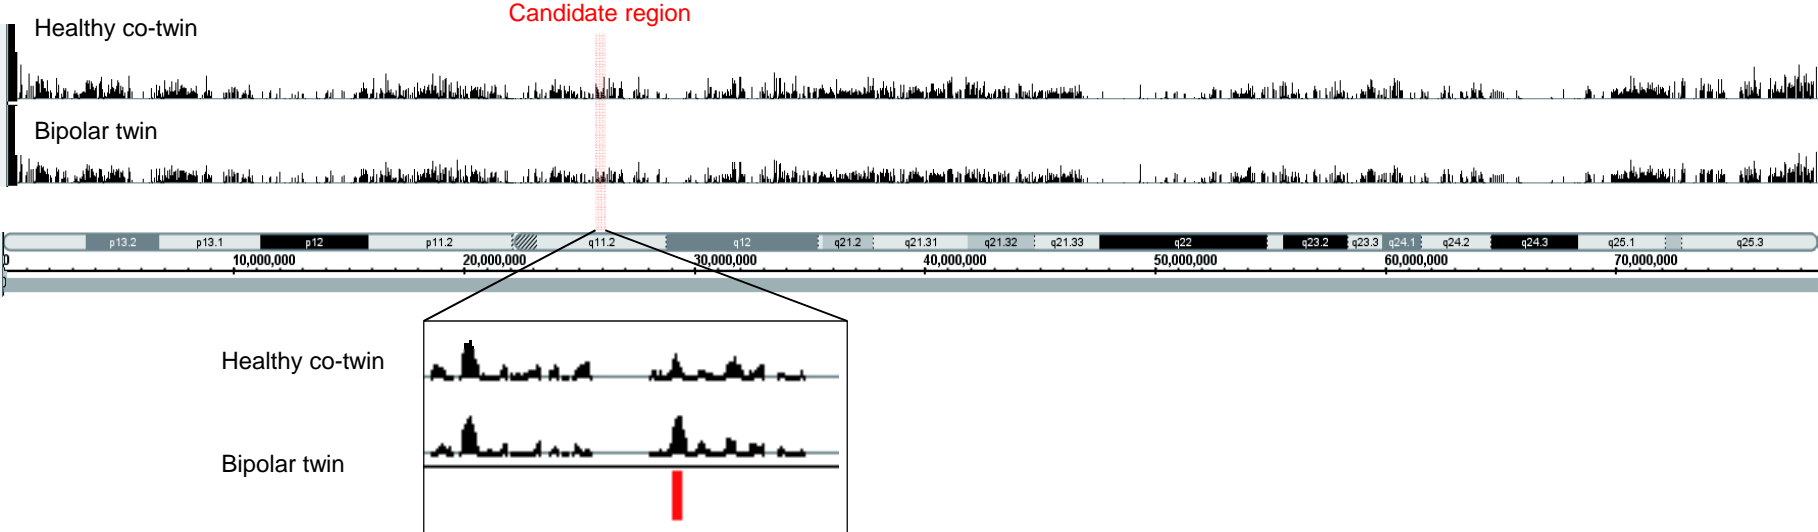

Supplement: tp201126x7.pdf [file tp201126x7.pdf]
